# Supplementary material for: Interaction between East Asian summer monsoon and west winds as shown by tree-ring records
Source: Copernicus journal article supplement (doi:10.5194/cp-2023-102), 2024-01-09
Supplement: Supplementary file [file cp-2023-102-RC1-supplement.pdf]

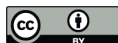

1 **Interaction between East Asian summer monsoon and west winds as**  
2 **shown by tree-ring records**

3

4 Shengchun Xiao<sup>1\*</sup>, Xiaomei Peng<sup>1</sup>, Quanyan Tian<sup>1</sup>, Aijun Ding<sup>2</sup>, Jiali Xie<sup>1</sup>, Jingrong  
5 Su<sup>1 3</sup>

6

7 <sup>1</sup> Key Laboratory of Ecological Safety and Sustainable Development in Arid Lands,  
8 Northwest Institute of Eco-Environment and Resources, Chinese Academy of  
9 Sciences, Lanzhou, Gansu, China 730000.

10 <sup>2</sup> College of Resources and Environment, Gansu Agricultural University, Lanzhou,  
11 Gansu, China 730070.

12 <sup>3</sup> University of Chinese Academy of Sciences, Beijing, China 100049.

13 \* Corresponding author (xiaosc@lzb.ac.cn).

14 Address: 320 West Donggang Road, Lanzhou City, Gansu Province, China.

15 Zip Code: 730000.

16

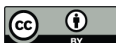

17 **Abstract:**

18

19 Against the background of changes in global atmospheric circulation, local changes in  
20 the East Asian summer monsoon (EASM) and the mid-latitude westerly winds will  
21 inevitably affect the climate and ecology of the arid zone of Northwest China. Hence,  
22 it is important to study these changes. We chose to observe these changes in the Alxa  
23 Plateau using dendrochronological methods. We assembled ring-width records from  
24 Qinghai spruce trees growing in the mountain regions surrounding the Alxa Plateau:  
25 the Helan Mountains, Changling Mountain, and Dongdashan Mountain. We analyzed  
26 these records for changes on interannual and interdecadal scales. Our results show that  
27 radial growth was indeed affected by changes in the monsoons and westerlies. The  
28 heterogeneity of precipitation and climatic wet-dry changes in different regions is  
29 primarily influenced by the interactions between atmospheric circulation systems, each  
30 with its own dominant controlling factors. In the case of the Helan Mountains, both of  
31 these major atmospheric circulation systems play a significant role in shaping climate  
32 changes. Changling Mountain in the southern part of the Alxa Plateau are mainly  
33 influenced by the EASM. Dongdashan Mountain is mainly influenced by the westerlies.  
34 Understanding these local conditions will help us predict climate changes in Northwest  
35 China.

36

37 **Key words:** Alxa Plateau, dendroclimatology, westerly winds, EASM, interaction  
38 between winds and monsoon

39

40



41 **1. Introduction**

42 **1.1 Importance of climate studies in northwestern China**

43 The alpine zone of Qinghai-Tibet, the arid zone of the northwestern interior, and the  
44 humid zone of the east constitute the three main areas of China's natural  
45 geomorphology (Chen et al., 2019b). The Northwest China inland dry zone is located  
46 in the hinterland of the Eurasian continent and is among the driest regions in the world.  
47 It exhibits typical continental climatic characteristics. This region is mainly influenced  
48 by westerly winds and the EASM. The interaction of these two factors results in high  
49 precipitation variability and hence frequent droughts. This would be the case even  
50 before global climate change began affecting the area; it is even more the case in current  
51 years. This inland dry zone is very much an ecologically fragile area (Chen et al., 2019a;  
52 Chen et al., 2019b; Zhang et al., 2023).

53 The semi-arid and arid regions of northern China are characterized by large areas  
54 of sand and desert. They are the second largest source of dust in the world after the  
55 Sahara. Their contribution to global climate change is large. So far inland, the influence  
56 of the EASM is often weak (Zhang et al., 2021; Liu et al., 2022). It is opposed by the  
57 westerly winds that flow from the North Atlantic climate zone toward the East Asian  
58 monsoon climate zone (Qu et al., 2004). The interaction between the westerly winds  
59 and the EASM governs precipitation, water vapor transport, and thus the climate of  
60 northwestern China (Feng et al., 2004; Wang et al., 2005; Li et al., 2008; Ma et al.,  
61 2011).

62 It is important to understand the history of this interaction if we are to estimate how  
63 global climate change will affect it. Global atmospheric circulation is likely to change  
64 as is the EASM. Climate change will not only affect the regional climate and regional  
65 water resources (Ding et al., 2023); it will affect East Asia (dust storms) and even the  
66 rest of the globe. Hence the study of climate in this region is of great practical and  
67 theoretical significance (Chen et al., 2019a; Chen et al., 2019b).

68 The westerly winds and the EASM meet at the northern boundary of the Asian  
69 summer monsoon (Huang et al., 2023). In northern China, this boundary runs from west  
70 to east, along the eastern section of the Qilian Mountains, the southern foothills of the



71 Helan Mountains, the Daqing Mountains, and the western section of the Daxinganling  
72 Mountains. This is not a static boundary. It fluctuates within a range of 200–700 km  
73 (Chen et al., 2018). It is important to understand the history of these fluctuations (Huang  
74 et al., 2023).

75 This can be done using climate records such as lacustrine, eolian, and  
76 dendrochronological (Sun et al., 2003; Liu et al., 2005; Li, 2009; Chen et al., 2010; Li  
77 et al., 2016; Chen et al., 2019b; Qin et al., 2023). Our research team specializes in  
78 dendrochronology, which is one of the best tools for studying paleoclimatic changes,  
79 due to its precise dating, high resolution, good continuity and high replication (Zhang  
80 et al., 2003; Shao et al., 2010; Yang et al., 2014; Liu et al., 2016).

81

## 82 1.2 Previous work

83 The climate history of the Baotou area, at the northern edge of the EASM, has been  
84 studied at interannual and interdecadal scales for the past 260 years, based on June–  
85 August precipitation reconstruction from tree-ring samples from the western Yinshan  
86 Mountains (Liu et al., 2001; Liu et al., 2003). Using tree-rings and historical records,  
87 Kang and Yang (2015) reconstructed the annual precipitation history of the East Asian  
88 monsoon northern fringe zone for the last 530 years. They analyzed spatial variability  
89 and possible driving mechanisms using the 400-mm isohyet.

90 Several May–July precipitation sequences have been reconstructed using ring-  
91 width and latewood-width data from Chinese pine (*Pinus tabulaeformis*) growing in  
92 the Helan Mountains (Ma et al., 2003; Liu et al., 2004; Chen et al., 2016). Studies of  
93 tree-ring carbon and oxygen isotopes from Chinese pine samples have shown that  $\delta^{18}\text{O}$   
94 values increase with summer precipitation, while  $\delta^{13}\text{C}$  values decrease (Zhang et al.,  
95 2005a; Liu et al., 2008). Westerly winds have also been shown to affect precipitation in  
96 the Helan Mountains (Chen et al., 2010).

97 Principal component analysis of tree-ring chronologies constructed from data  
98 collected at several sites in Gansu suggests that trees at these sites were more influenced  
99 by EASM than by west winds (Chen et al., 2013). These researchers also found that the  
100 EASM weakened in 1970s, but recovered in the early 1990s. Tree-ring data allowed the



101 reconstruction of 330 years of PDSI values for the Mount Hasi region (at the northern  
102 boundary of the summer monsoon zone) (Kang et al., 2012). This study confirmed that  
103 radial growth of Chinese pine has declined over the past three decades, due to the  
104 weakening of the EASM. Dendrochronological reconstruction of precipitation in the  
105 Mount Changling region (again using Chinese pine) suggested that precipitation in that  
106 region mainly depends on the EASM (Chen et al. 2012). Other researchers have  
107 assembled tree-ring chronologies from pines growing in the Mount Qilian region and  
108 the northern mountains of the Hexi Corridor. Here again precipitation is associated with  
109 the EASM. These chronologies have allowed scholars to compile precipitation,  
110 temperature, and drought records for the last thousand years (Gou et al., 2015a; Gou et  
111 al., 2015b; Zhang et al., 2017).

112 Most modern researchers studying climate change in the region are mostly carried  
113 out on single sample sites (Wang et al., 2004; Liu et al., 2005; Chen et al., 2010; Chen  
114 et al., 2016; Li et al., 2016; Liu et al., 2016; Chen et al., 2018). There is a dearth of  
115 multi-site, regional, **large-scale studies** on the interaction of the westerlies and the  
116 EASM. **Our group** compiled and analyzed tree-ring chronologies from Qinghai spruce  
117 (*Picea crassifolia*) growing in the Helan, Changling, and Dongdashan mountain regions  
118 that surround the Alxa Plateau, the climate response characteristics of spruce radial  
119 growth in three regions was then analyzed. Combining the relevant Westerly and East  
120 Asia monsoon circulation indices, the driving mechanism of the regional climate  
121 change by with the interaction and synergistic roles of two atmospheric circulation  
122 systems in the Alxa Plateau was explored. The results will lay a theoretical foundation  
123 for the climatic evolution of the region and the desertification control.

124

## 125 **2. Material and methods**

### 126 **2.1 Study area**

127 The Alxa Plateau is located in the western part of the Inner Mongolia Autonomous  
128 Region and is surrounded by mountains (Fig.1). It consists primarily of three deserts:  
129 Tengger, Ulan Buh, and Badan Jaran. It lies south of the Gobi desert. It is the main  
130 source of the fierce sandstorms and dust storms that blow toward eastern China and the



131 Pacific. It has been much affected by climate change; sand- and dust storms have  
132 increased, much to the detriment of lands to the east. The Chinese government is doing  
133 what it can to establish an environmental defense line there. It is currently the Northern  
134 Sand Prevention Belt of the National Two Ecological Barrier and Three Belts  
135 Ecological Security Strategy Pattern (Xiao et al., 2017; Xiao et al., 2019).

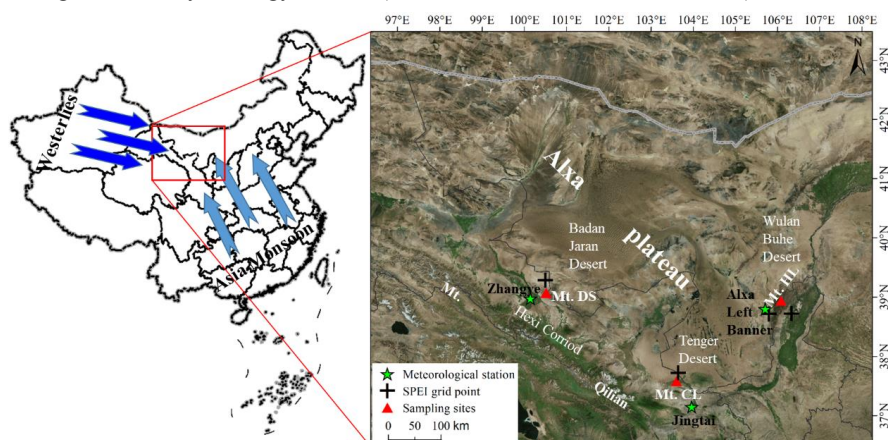

136  
137 Figure 1. Location of tree-ring sampling sites and meteorological stations (the right  
138 panel is from Mapworld)

139 There are several mountain ranges surrounding the Alxa Desert, such as the Helan  
140 Mountains in the east, the northern mountains of the Hexi Corridor, and the outliers of  
141 the Altai Mountains in the north. These mountains not only block the eastward and  
142 southward expansion of the desert (driven by high pressure regions from Mongolia);  
143 they are also the source of mountain rivers and streams that water the oases on the  
144 plateau.

145 The Alxa Plateau is located in the eastern margin of the inland arid region of Central  
146 Asia. It is affected not only by the mid-latitude westerly circulation, but also by the  
147 Asian monsoon and the plateau monsoon. It is in the zone where the mid-latitude  
148 westerly circulation and the Asian monsoon interact (Xiao et al., 2017; Chen et al.,  
149 2019b). As a result, there is large interannual variability of vegetation cover in the  
150 region (Ou and Qian, 2006; Tang et al., 2006; Li et al., 2013).

151 The Helan Mountains ( $38^{\circ}27' \sim 39^{\circ}30'N$ ,  $105^{\circ}20' \sim 106^{\circ}41'E$ ) (sampling site  
152 henceforth abbreviated as HL), are located at the eastern edge of the Tengger Desert.



153 They stretch more than 200 kilometers from north to south; the main peak is ~3,556 m.  
154 The mountain forests are dominated by Qinghai spruce and Chinese pine, juniper,  
155 mountain aspen, and elm.

156 Mount Changling (37°12'~37°17', 102°45'~103°48'E) (sampling site henceforth  
157 abbreviated as CL) is an independent mountain protruding northward from the  
158 remnants of the eastern Qilian Mountains, It is located at the southern edge of the  
159 Tengger Desert; its elevations range from 2100 to 2900 m. The dominant tree species  
160 are Qinghai spruce and Chinese pine.

161 Mount Dongdashan (39°00'~39°04'N, 100°45'~100°51'E) (sampling site  
162 henceforth abbreviated as DS) is located at the southwestern edge of the Badan Jaran  
163 Desert and the middle part of Mount Qilian. It is one of the northern mountains along  
164 the Hexi Corridor; that range consists of mountains that vary from 2200 to 2637 m in  
165 elevation. Forests are dominated by Qinghai spruce and Qilian juniper.

166 The temperatures of the coldest months recorded at meteorological stations in the  
167 Alxa Left Banner (a division of the Alxa League region), Jingtai (a county in Gansu),  
168 and Zhangye (a city in Gansu) all occurred in January, ranging from -9.8°C to -6.8°C.  
169 The hottest months at those stations were in July (21.9°C to 23.1°C). These  
170 meteorological stations are the closest stations to our three sampling sites.

171 Precipitation measured at those stations varied widely. The multi-year average of  
172 total precipitation from May to September was 171 mm at Alxa Left Banner station,  
173 156 mm at Jingtai station, and 108 mm at Zhangye station. This accounted for more  
174 than 80% of the annual precipitation (Fig.2).

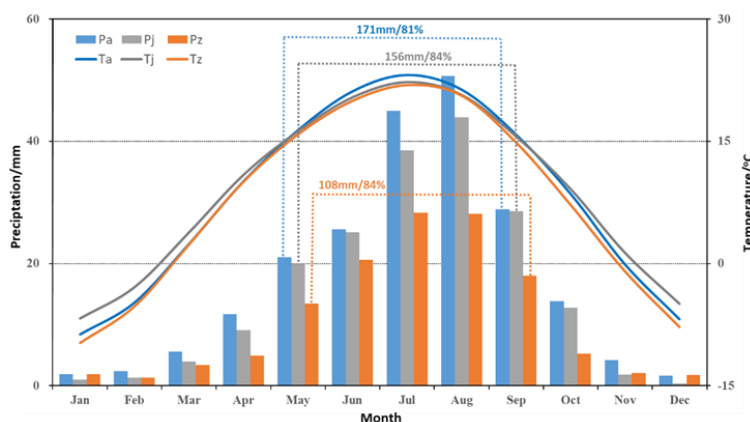

175

176 Figure 2. Climatic diagram of study area. Pa/Ta are the monthly total precipitation and  
177 monthly mean temperature at the Alxa Left Banner meteorological station (1953–2016);  
178 Pj/Tj are the precipitation and temperature figures for the Jingtai meteorological station  
179 (1957–2017); Pz/Tz are the precipitation and temperature figures for the Zhangye  
180 meteorological station (1957–2017). The dashed box and appended data indicate the  
181 total growing season precipitation in the study area and the proportion of total annual  
182 precipitation.

183

## 184 2.2 Sample collection, processing and data analysis method

### 185 2.2.1 Sample collection, processing and dendrochronology construction

186 Researchers used standard methods of tree-ring sample collection. One core was drilled  
187 from each tree in the sample site. We collected 209 cores in total, from five sampling  
188 sites at HL, 48 cores from one sampling site at CL, and 81 cores from two sampling  
189 sites at DS. Relevant information re the sampling sites is summarized in Table 1.

190 Chronologies were constructed using standard dendrochronological methods. We  
191 calculated the highly significant correlations ( $P < 0.001$ ) between the chronologies of  
192 different points at the HL and DS mountains; a weighting method was used to finally  
193 synthesize a chronology for each mountain.

194

### 195 2.2.2 Climate data, atmospheric circulation indices and the related Analyzing 196 methods for chronological correlation





197 Climate data for the study areas HL, CL, and DS were collected from the nearest  
198 meteorological stations in Alxa Left Banner, Jingtai and Zhangye, respectively  
199 (<http://data.cma.cn>).

200 We used **SPEI** to represent the local drought and wetness conditions. SPEI data  
201 (grid-point resolution  $0.5^{\circ} \times 0.5^{\circ}$ ) was obtained from the grid-point datasets of the  
202 National Center for Environmental Predictions-National Center for Atmospheric  
203 Research (NCEP-NCAR). Time scales ranged from 1 month to 15 months. The mean  
204 values of data from two grid-points closest to the HL sampling site ( $38.75^{\circ}\text{N}, 105.75^{\circ}\text{E}$   
205 and  $38.75^{\circ}\text{N}, 106.25^{\circ}\text{E}$ ; period 1953–2015) were chosen for subsequent analysis. Grid-  
206 point data from one site closest to our CL sampling site ( $37.75^{\circ}\text{N}, 103.75^{\circ}\text{E}$ ; period 1951–  
207 2015) was used for later analysis. Grid-point data from one site closest to our DS  
208 sampling site ( $39.25^{\circ}\text{N}, 100.75^{\circ}\text{E}$ ; period 1951–2015) was also used. As SPEI datasets  
209 are multi-scale, we preprocessed the data to identify and select 11-month scaled SPEI  
210 datasets for subsequent analysis.

211 We took into account the so-called lagging effect (the influence of fall and winter  
212 climate factors on the radial growth of trees shows up later in the year) and chose to use  
213 temperature, precipitation, and SPEI data from September of the previous year to  
214 September of the current year (abbreviated as P9–P12 and C1–C9), as collected at each  
215 meteorological station, for our climate response analysis.

216 **The East Asian Summer Monsoon Index (EASMI)** represents the activity strength  
217 of the EASM. Larger EASMI values indicate a stronger summer monsoon, smaller ones  
218 a weaker monsoon. In this study, the EASMI (mean values for June–August in the  
219 period 1950–2017) defined by Li and Zeng (2005) was used to study the impact of the  
220 EASM on climate change in the study area.

221 We used the **Westerly Circulation Index (WCI annual mean)** to represent the  
222 strength of the mid-latitude westerlies. The larger the WCI value, the stronger the  
223 Eurasian latitudinal circulation; the smaller the value, the weaker the Eurasian  
224 latitudinal circulation. WCI data (period 1951–2015) were derived from the Eurasian  
225 Latitudinal Circulation Index published by the National Climate Center of the China  
226 Meteorological Administration (<https://cmdp.ncc-cma.net/cn/index.htm>).



227 Interannual and interdecadal (sliding moving average of 11a) chrono-climatic/  
228 cyclonic index correlation and partial correlation analyses were performed using SPSS  
229 19.0. Based on the characteristics of tree-ring series, the sequences were classified into  
230 three groups of low, average and high ring widths using  $\text{mean} \pm 1\delta$  (SD) as the  
231 classification criterion (with  $\text{mean} \pm 2\delta$  as the extreme year). Correlation statistical tests  
232 were performed with the corresponding annual circulation indices; similar treatments  
233 and analyses were performed for the two major circulation indices.

234

235

### 236 **3. Results and analysis**

#### 237 **3.1 Ring-width chronologies and their characteristics**

238 Based on the sampling cores from five sample sites at HL, two sample sites at DS, and  
239 one sample site at CL, ring-width residual chronologies were derived for each of the  
240 three study areas (Fig. 3). Statistical parameters showed that the three chronologies  
241 meet the usual requirements for correctly done dendrochronological studies. (Table 1).

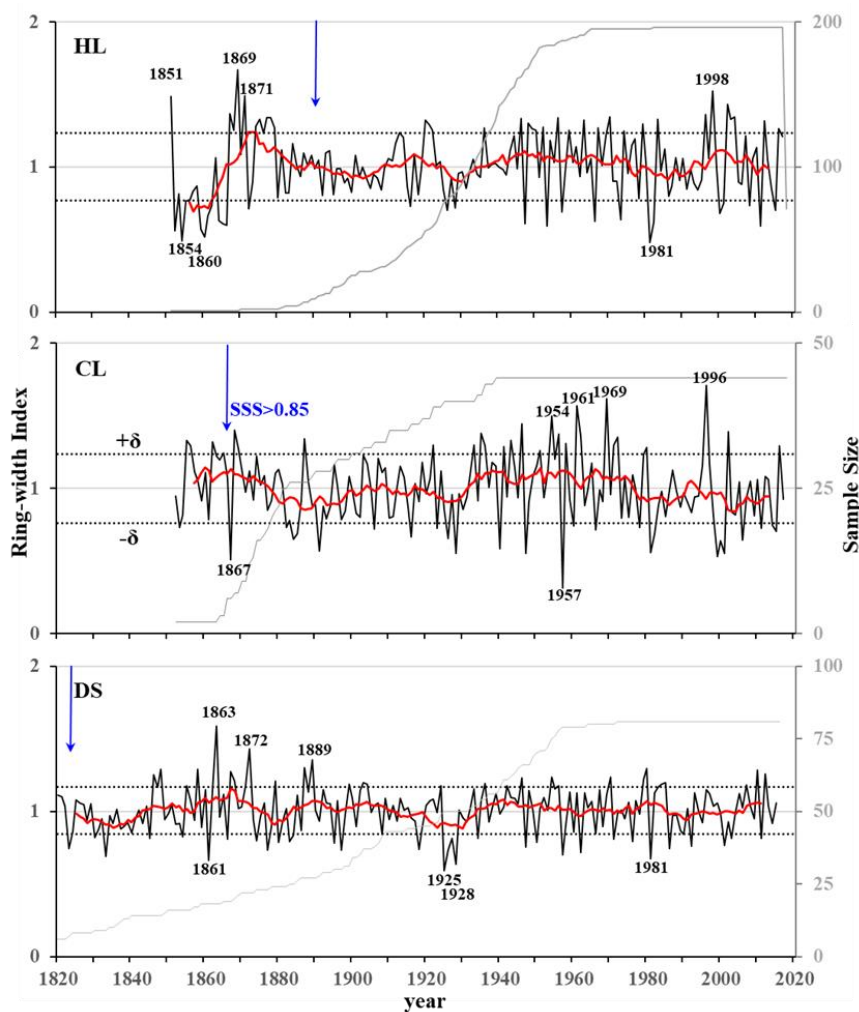

242

243 Figure 3. Residual ring-width chronologies for the three study areas. The dark lines  
 244 indicate the chronology; grey lines indicate the sample depth; red lines indicate the 11-  
 245 year running mean chronology; dotted horizontal lines indicate the mean value  $\pm 1\delta$ ,  
 246 years with data identified as  $>/<$  mean  $\pm 2\delta$  ( $\delta$ : standard deviation); the blue arrows  
 247 indicate the start of the reliable residual chronology ( $SSS > 0.85$ ).

248 Table 1. Statistical characteristics of the sampling sites and the tree-ring chronologies.

| Sampling sites  | HL(5)         | CL(1)  | DS(2)  |
|-----------------|---------------|--------|--------|
| Latitude ( °N)  | 38.52–38.97   | 37.61  | 39.04  |
| Longitude ( °E) | 105.83–106.02 | 103.71 | 100.78 |



|                 |           |           |           |
|-----------------|-----------|-----------|-----------|
| Elevation (m)   | 2200–2750 | 2490      | 2650–2700 |
| Cores           | 209       | 48        | 81        |
| Reliable period | 1891–2018 | 1866–2017 | 1823–2015 |
| MS              | 0.18–0.37 | 0.28      | 0.15–0.33 |
| Rbar            | 0.45–0.61 | 0.56      | 0.40–0.60 |
| SNR             | 22.5–56.1 | 38.9      | 25.7–42.5 |
| EPS             | 0.96–0.98 | 0.98      | 0.96–0.98 |
| PC1(%)          | 17.3–63.0 | 57.9      | 43.0–62.5 |

249 Reliable period, MS (mean sensitivity), Rbar (mean series intercorrelation), SNR (signal to noise ratio),  
250 EPS (expressed population signal), and PC1 (variance explained by the first principal component) refer  
251 to residual chronologies.

252

### 253 **3.2 Climate response characteristics**

254 Correlation analysis comparing a) monthly mean temperature and precipitation at  
255 neighboring meteorological stations and b) SPEI at the nearest grid-point showed that,  
256 overall, the three residual chronologies were correlated negatively with monthly mean  
257 air temperature, positively correlated with monthly precipitation, and positively  
258 correlated with SPEI during the growing season (Fig. 4).

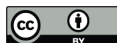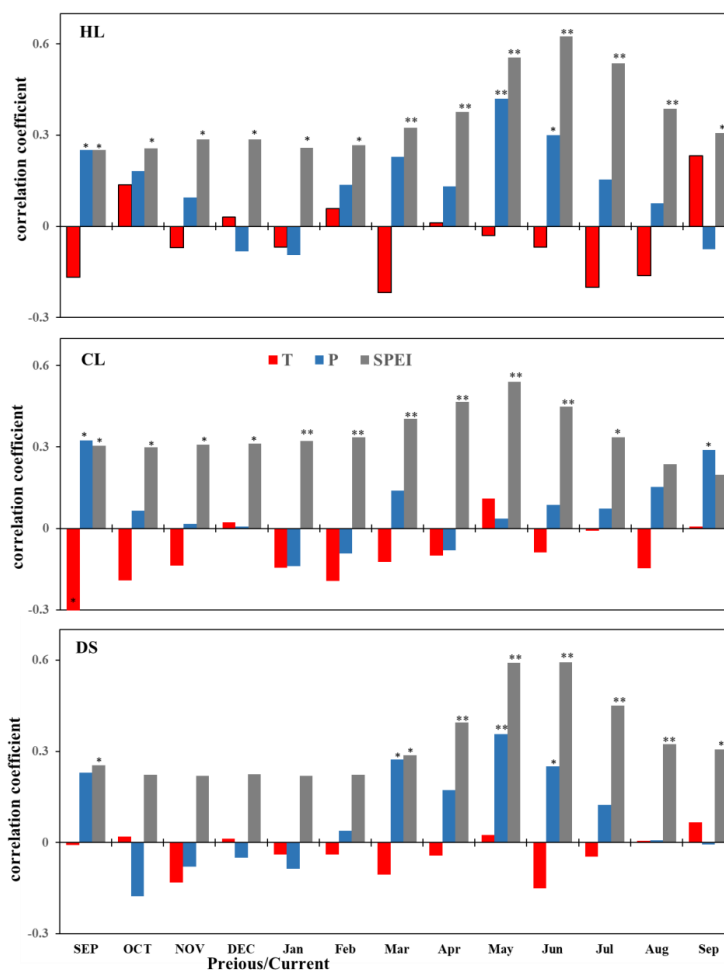

259  
 260 Figure 4. Correlation coefficients (Pearson's r values) between the residual ring-width  
 261 chronologies of Qinghai spruce at the three study areas (HL, CL and DS) and the  
 262 observed monthly temperature (T), total monthly precipitation (P), and SPEI.

263 \* Pearson's r correlation, significant at  $P < 0.05$ .

264 \*\* Pearson's r correlation, significant at  $P < 0.01$ .

265 Month names of previous year are capitalized.

266 HL chronology was correlated negatively with mean temperature mainly in C5–C8  
 267 in the growing season, but not to the significant level. It was also positively correlated  
 268 with precipitation in all months except P12, C1, and C9, reaching significant levels  
 269 ( $P < 0.05$ ) in P9, C5, and C6. All months were positively correlated with SPEI and



270 reached statistical significance ( $P<0.05$ ), with C3–C8 showing highly significant  
271 correlation levels ( $P<0.01$ ).

272 CL chronology was negatively correlated with mean temperature in all months  
273 except for P12, C5 and C9. Only P9 reached statistical significance ( $P<0.05$ ). CL  
274 chronology was positively correlated with monthly precipitation, save for C1, C2, and  
275 C4. Only P9 and C9 reached statistical significance ( $P<0.05$ ). All months were  
276 positively correlated with SPEI, with P9–C7 reaching significant correlation levels  
277 ( $P<0.05$ ) and C1–C7 reaching highly significant correlation levels ( $P<0.01$ ).

278 DS chronology showed weak correlations between DS chronology and monthly  
279 mean temperatures. None of the correlations reached levels of significance. DS  
280 chronology was positively correlated with P9 and C2–C8 precipitation and reached  
281 significant correlation levels for C3, C5, and C6 ( $P<0.05$ ). All months were positively  
282 correlated with SPEI, with P9 and C3–C9 reaching significant correlation levels  
283 ( $P<0.05$ ) and C4–C8 reaching highly significant correlation levels ( $P<0.01$ ).

284 Overall, the radial growth of Qinghai spruce at the three study areas seems to have  
285 been limited, for the most part, by low precipitation during the growing season (April–  
286 July). The three chronologies reflect regional wet and dry variations.

287

### 288 3.3 Regional climate changes as recorded by tree-ring widths

#### 289 3.3.1 Regional climate change viewed at interannual scales

290 On interannual scales, the three residual chronologies, when compare, showed highly  
291 significant correlations. HL-CL:  $n=166$  ( $P<0.01$ ); HL-DS:  $n=165$  ( $P<0.01$ ); CL-DS:  
292  $n=164$ ,  $P<0.01$ ). This indicates that there was a high degree of consistency in the radial  
293 growth of Qinghai spruce in the three regions.

294 According to the results of the chronology-climate response analysis in the  
295 previous section, the high and low ring-width indices ( $\text{mean} \pm 1 \sim 2\delta$ ) of the chronology  
296 at the three sample sites indicate wetter or drier, and extreme wet or dry years,  
297 respectively (Table 2).

298 Overall, the three ring-width residual chronologies (HL, CL, DS) had a total of two  
299 shared wetter years and seven shared drier years. The HL and CL chronologies shared



300 four wet years and eleven dry years; the HL and DS chronologies shared five wet years  
 301 and nine dry years; and the CL and DS chronologies shared five wet years and seven  
 302 dry years (Table 2).

303 **Table 2. Years of high or low growth, wet or dry climate in the three chronologies**

| chronology | Higher index/wetness years ( $\geq \text{mean} + 1\delta$ )                                                                                                                                                                                                                                        | Lower index/drought years ( $\leq \text{mean} - 1\delta$ )                                                                                                                                                                                                                             |
|------------|----------------------------------------------------------------------------------------------------------------------------------------------------------------------------------------------------------------------------------------------------------------------------------------------------|----------------------------------------------------------------------------------------------------------------------------------------------------------------------------------------------------------------------------------------------------------------------------------------|
| HL         | <b>1851</b> , 1867, <b>1869</b> , <b>1871</b> , 1874, 1875,<br>1877, 1878, <u>1879</u> ,<br>1920, 1921, <u>1922</u> , <u>1936</u> , <u>1946</u> , 1952,<br><u>1959</u> , 1963, 1967, <u>1970</u> , 1974, <u>1979</u> ,<br>1983, 1996, <b>1998</b> ,<br>2002, 2003, 2004, <u>2012</u> , <u>2016</u> | 1852, <b>1854</b> , 1855, 1859, <b>1860</b> , <u>1861</u> ,<br>1864, 1865, 1866, 1872,<br><u>1916</u> , <u>1926</u> , <u>1928</u> , <u>1947</u> , 1953, <u>1957</u> ,<br><u>1966</u> , 1973, <b>1981</b> , <u>1982</u> ,<br><u>2000</u> , <u>2001</u> , <u>2011</u>                    |
| CL         | <u>1855</u> , 1862,<br><u>1922</u> , 1933, 1935, <u>1936</u> , 1941, <u>1946</u> ,<br>1951, <b>1954</b> , 1958, <b>1961</b> , <b>1969</b> , 1972,<br><u>1980</u> , <b>1996</b> ,<br><u>2016</u>                                                                                                    | <b>1867</b> , 1884, 1885, 1891,<br><u>1916</u> , 1923, <u>1926</u> , <u>1928</u> , <u>1947</u> , <b>1957</b> ,<br>1960, <u>1966</u> , 1978, <u>1981</u> , <u>1982</u> , 1999,<br><u>2000</u> , <u>2001</u> , 2006, <u>2011</u> , 2014, 2015                                            |
| DS         | 1846, 1848, <u>1855</u> , 1858, <b>1863</b> , 1867,<br>1868, <b>1872</b> , <u>1879</u> , 1887, <b>1889</b> , 1899,<br>1903, 1904, 1924, <u>1936</u> , 1942, <u>1946</u> ,<br><u>1954</u> , 1956, <u>1959</u> , <u>1970</u> , <u>1979</u> , <u>1980</u> ,<br>2007, 2010, <u>2012</u>                | 1823, 1830, 1833, <u>1854</u> , <b>1861</b> , 1874,<br>1877, 1880, 1883, 1884, 1895, 1897,<br>1908, <b>1925</b> , <u>1926</u> , 1927, <b>1928</b> , 1934,<br><u>1947</u> , 1950, <u>1957</u> , 1962, 1971, 1976,<br><b>1981</b> , 1985, 1990, 1992,<br><u>2001</u> , 2003, <u>2011</u> |

304 Note: Bold is used to indicate **extreme years** ( $>/< \text{mean} \pm 2\delta$ ;  $\delta$ : standard deviation); double  
 305 underlining indicates years shared between two of the three sample sites; bold underlining  
 306 shows years shared between three sample sites.

307 There were no extremely wet years shared by the three sample sites. However, there  
 308 were two shared wetter years in 1936 and 1946 and several shared wetter years in later  
 309 years among the three sample sites. For example, note the wetter years in 1922 and  
 310 2016 for HL and DS chronologies; 1959, 1979, and 2012 for HL and DS chronologies;  
 311 1855, 1954, and 1980 for CL and DS chronologies (Table 2).

312 The extreme drought years are consistent among the three sample sites. For  
 313 instance, there was an extreme drought year in 1981 at HL and DS sample sites; it was  
 314 also a drought year at CL. An extreme drought year at CL in 1957 was also a drought  
 315 year for the other two chronologies. Moreover, the extreme drought year of 1928 at DS  
 316 was a drought year at the other two sites. Drought years in 1926, 1947, 2001, and 2011



317 were seen in all three sites and in two of the three sample sites (1916, 1966, 1982, and  
318 2000 at HL and CL; 1854 and 1861 at HL and DS) (Table 2).

319

### 320 **3.3.2 Characteristics of regional climate change at inter-decadal scales**

321 On the decadal scale, the 11a running mean series indicates that at the HL site there  
322 were four wetter periods (mid-1860s to early 1880s; 1910s to 1920s; mid-1930s to mid-  
323 1970s; and late 1990s to early 2010s). Four drought periods were seen (mid-1850s to  
324 mid-1860s; early 1890s to late 1900s; circa 1930s; and mid-1970s to 1980s) (Fig.5).

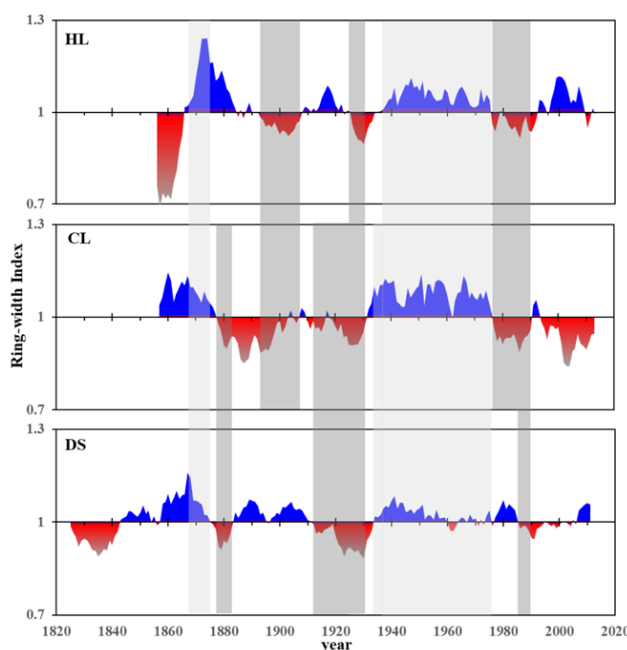

325

326 **Figure 5.** Three regional chronologies demonstrating alternation between dry and wet  
327 years on interdecadal scales (11 a running mean). The gray bands indicate consistent  
328 changes.

329 The CL regional chronology revealed two main wetter periods (mid-1850s to mid-  
330 1870s; mid-1930s to mid-1970s) and two longer drought periods (late 1870s to early  
331 1930s; following the late 1970s) (Fig.5).

332 The DS regional chronology showed four main wetter periods (mid-1840s to mid-  
333 1870s; mid-1880s to late 1900s; mid-1930s to mid-1980s; and late 2000s to early





334 2010s). There were four drought periods (mid-1820s to mid-1840s; mid-1870s to 1880s;  
335 early 1910s to early 1930s; and late 1980s to mid-2000s). The drought during the last  
336 drought period was less severe (Fig.5).

337 The three chronologies show both synchronized phases and differential changes on  
338 an interdecadal scale. The more synchronized dry phases of climate change were the  
339 drought periods of the 1930s and 1990s. When we compared the DS chronology to the  
340 HL and CL chronologies on decadal scales, we noted that DS droughts tended to last  
341 longer and that they started and ended later than CL droughts. However, HL and DS  
342 droughts tended to end at ~~close to~~ the same time (Fig.5).

343 There were two wet periods in 1870s and the mid-1930s to 1970s which were  
344 shared by all three sample sites. The latter period was the longest lasting wet period we  
345 saw in our study. There were also dry and wet periods that were not shared by any of  
346 our sites. There was an HL drought (mid-1850s to mid-1860s) which was not shared by  
347 the other two sites, which were wetter. HL and CL shared drought periods (1890s to  
348 1910s; 1980s) while DS was wetter. Conversely wetter periods at HL were sometimes  
349 accompanied by drought in the other two sites. Drought at CL was sometimes  
350 accompanied by wet periods at the other two sites. DS was wet during the 2010s but  
351 the other two sites were in drought (Fig.5).

352 The results of the above studies show that there are diversified and complex  
353 features in the interdecadal processes of climate change in different regions around the  
354 Alxa Plateau.

355

### 356 **3.4 Driving mechanism of the regional climate changes**

#### 357 **3.4.1 Driving mechanism of the regional climate changes of typical years**

358 On the interannual scales, three regional chronologies we developed showed fairly  
359 weak negative correlations between the EASM and the westerlies; none of the  
360 correlations were statistically significant. We carried out correlation analyses of the  
361 three regional ring-width chronologies and two major circulation indices. This was  
362 done in high, medium and low ring-width index groups (Fig. 6; 7).



363 At HL, the results of our combined subgroup correlation analyses suggest that  
364 correlations between radial growth groups and atmospheric circulations were stable.  
365 Correlation between the higher ring-width group and atmosphere circulation indices  
366 and between the lower ring-width group and the WCI were all significant ( $P < 0.05$ ) (Fig.  
367 6; 7).

368 At CL, correlations between the higher and middle ring-width groups to the WCI  
369 and the higher and middle WCI groups to the ring-width index were all negative.  
370 Correlations between the higher and middle ring-width groups and the EASMI, and  
371 between the higher and middle EASMI groups with the ring-width index were  
372 inconsistent (Fig. 6; 7).

373 At DS, correlations between the higher and lower ring-width groups and the  
374 EASMI, and between the higher and lower EASMI groups to the ring-width indices,  
375 were consistent. The correlations between the higher ring-width groups and the WCI,  
376 and between the higher WCI groups and the ring-width index were consistent. However,  
377 the correlations between the lower ring-width groups and the WCI, also between the  
378 lower WCI groups and the ring-width index, were inconsistent (Fig. 6; 7).

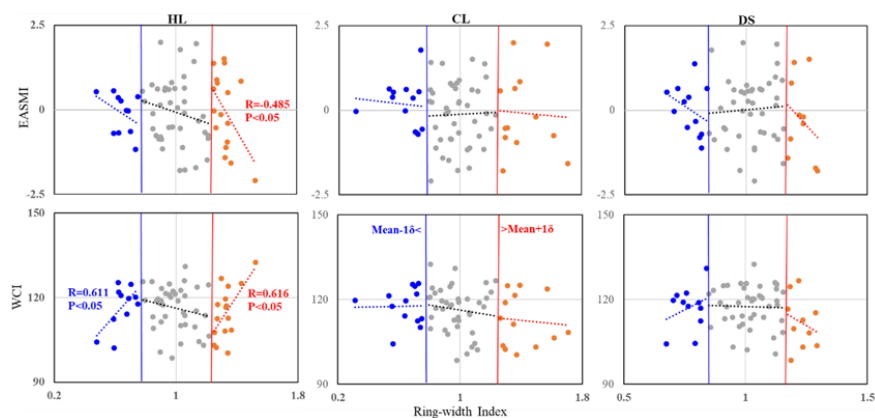

379  
380 **Figure 6.** Grouping related charts among the ring-width index of three regions (HL, CL  
381 and DS) and the two atmospheric circulations' indices (EASMI and WCI). The noted  
382 numbers are the person correlation coefficients (two-tails test) and the corresponding  
383 significant credible level. Red dots indicate the higher ring-width index group



384 (>mean+1δ), gray dots indicate the middle ring-width index group (>mean-1δ~<  
385 mean+1δ), and blue dots indicate the lower ring-width index group (>mean-1δ).

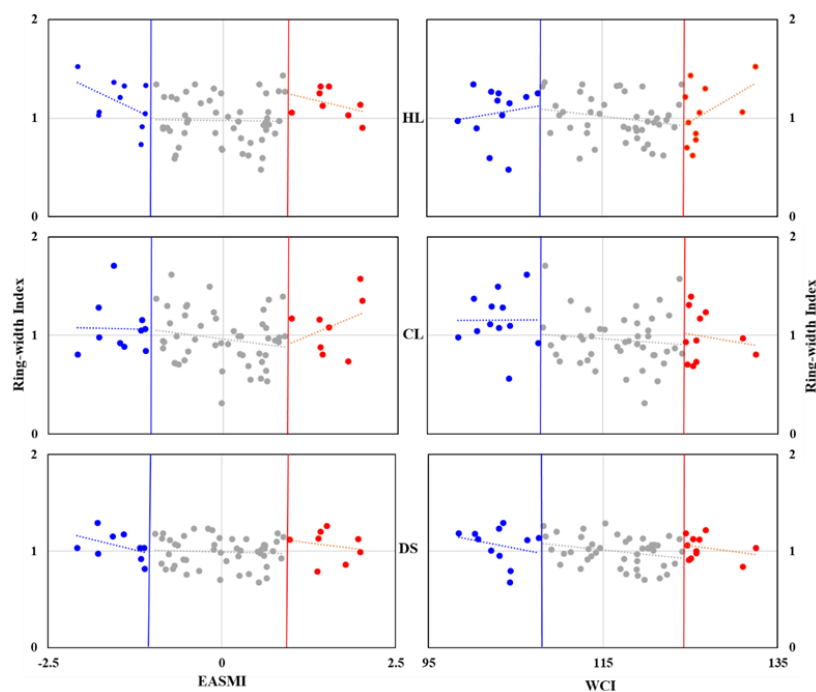

386  
387 **Figure 7.** Grouping related charts among the two atmosphere circulations' index  
388 (EASMI and WCI) and the ring-width index of three regions (HL, CL, and DS). Red  
389 dots indicate the higher atmosphere circulations' index group (>mean+1δ), gray dots  
390 indicate the middle atmosphere circulations' index group (>mean-1δ~< mean+1δ), and  
391 blue dots indicate the lower atmosphere circulations' index group (>mean-1δ).

392 Except for HL, none of the ring-width groups or the atmospheric circulation index  
393 groups of the others reached a level of significance. These results suggest that HL is  
394 strongly affected by size of, and the interaction between, the EASM and the westerlies.  
395 On an interannual scale, stronger west winds and a weaker monsoon could result in  
396 variations from the ordinary climate (veering towards drier or wetter). Weaker west  
397 winds and a stronger monsoon formed the normal climate at HL. At the CL and DS  
398 sites, both atmospheric circulations were relatively weak on interannual scales. They  
399 had complex interactions.

400



401 **3.4.2 Driving mechanisms of the regional climate changes on a decadal scale**

402 At HL, both the EASM and the westerly circulation had highly significant effects on  
403 the radial growth of the Qinghai spruce. At CL, the EASM also had highly significant  
404 effects on radial growth of the Qinghai spruce. There, correlation coefficients were  
405 higher for the EASMI (EASM index) than they were for the HL index. Correlations  
406 between the WCI and radial growth were negative, but not at a significant level.

407 At DS, correlation between radial growth and the WCI was extremely negative  
408 ( $P < 0.01$ ). Correlation between radial growth and the EASM was positive ( $P > 0.1$ ) (Fig.  
409 8). These results suggest that at HL, alternations between dry and wet seasons were  
410 affected both by the EASM and the westerlies. If either of the two atmospheric  
411 circulations was stronger, the climate tended to be wetter. At CL, alternations between  
412 dry and wet were affected mainly by the EASM. When the EASM was stronger, the  
413 climate was wetter. At DS, the climate was affected mainly by the westerly winds. The  
414 stronger the winds, the wetter the climate (Fig. 8).

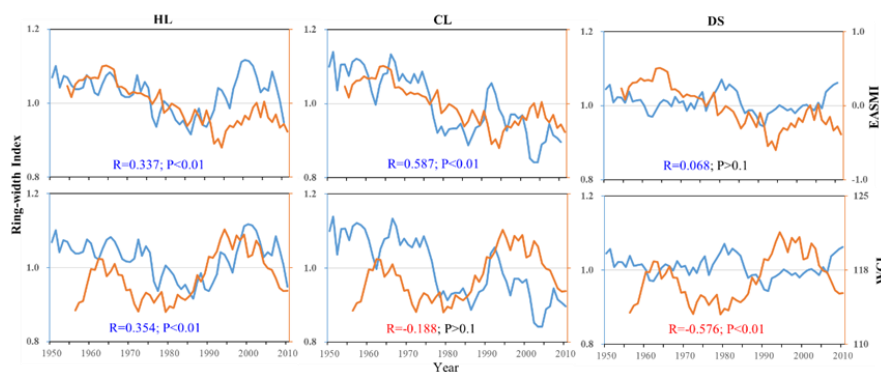

415

416 Figure 8. Interdecadal scale (11-a running average) correlations of the three residual  
417 chronologies with the EASMI and WCI.

418 The results of our interdecadal partial correlation analysis of the three RES-  
419 chronologies with the WCI and EASMI further illustrate the impacts of the two  
420 circulation systems on the climate of the three regions (Table 3).

421 At HL, if we control one factor (the WCI or EASMI) from our analysis, the other  
422 factor showed a positive correlation ( $P < 0.0001$ ). At CL, if we controlled the WCI, we  
423 find a positive significant correlation with EASMI ( $P < 0.0001$ ). If we controlled the



424 effect of EASMI, we saw a weak negative correction with WCI (Table 3). At DS, if we  
425 controlled EASMI, we saw a negative significant correlation with WCI ( $P < 0.0001$ ). If  
426 we controlled the WCI, we saw an insignificant negative correlation with EASMI  
427 (Table 3).

428 Table 3. Inter-decadal partial correlation analysis of the three residual-chronologies  
429 with the WCI and EASMI.

|       | HL           | CL       | DS            |
|-------|--------------|----------|---------------|
| WCI   | 0.489<br>*** | 0.550*** | -0.172        |
| EASMI | 0.511***     | -0.001   | -<br>0.591*** |

430 Correlation significance levels (two-tailed test): \*\*\*  $P < 0.001$ .

431 Summary: at HL (on the eastern boundary of the Alxa Plateau), both EASMI and  
432 WCI influenced the alternation between wet and dry; at CL (on the southern boundary  
433 of the Alxa Plateau), climate was mainly influenced by the EASM. At DS (on the  
434 western boundary of the Alxa Plateau and the middle part of Hexi Corridor), climate  
435 was mainly influenced by the westerly winds.

436

#### 437 4. Discussion and conclusions

##### 438 4.1 Climate changes indicated by regional chronologies

439 Our chronology-climate response analysis (Fig. 4) showed that the radial growth index  
440 of Qinghai spruce in the HL, CL and DS mountains were a good record of regional  
441 climate changes around the Alxa Plateau (Fig. 3). On the interannual scale, the three  
442 regional chronologies noted that the extreme drought years of 1928, 1957 and 1981  
443 were shared by two or more locations, as were the drought years of 1854, 1861, 1916,  
444 1926, 1947, 1966, and 2001 (Fig. 3 and Table 3).

445 We note that drought was also reported by other tree-ring studies for these regions  
446 (Chen et al., 2016), also for the Qilian Mountains (Zhang et al., 2011; Zhang et al.,  
447 2017). Several other drought years (1854, 1884, and 1925–1928) were also seen in the  
448 dry-wet climate history (PDSI) (recorded by tree-ring-widths) in the nearby area of



449 Mount Hasi, which lies on the edge of the regions most influenced by the EASM (Kang  
450 et al., 2012).

451 The drought years of 1823, 1833, 1854, 1877, 1883–1885, 1895, 1908, 1971, 1992,  
452 and 2003 seen in results for the Alxa Plateau are also seen in twelve tree-ring  
453 reconstructed drought series for the Qilian Mountains (an area mainly influenced by  
454 westerly winds) (Zhang et al., 2011). We also note that wetter years seen in our three  
455 regional chronologies were also seen in results from the Hasi and Xinglong Mountains,  
456 which are also on the edge of the area influenced by the EASM) (Fang et al., 2009;  
457 Kang et al., 2012).

458 If we compare our results with those seen for the EASM-affected areas at Mount  
459 Guiqing, 1820–2005 (Fang et al., 2010), we noted that only three of the eight drought  
460 years in that area (1928, 2000, and 2001) were seen in our three chronologies. We also  
461 noted results from the westerly-influenced area at Mount Tianshan (Jiang et al., 2017).  
462 The wetter years of 1846, 1903 and 1942 at DS were also extreme wet years at Mount  
463 Tianshan. Two wet years, 1848 and 1959, recorded at DS are either one year earlier or  
464 one year later than extremely wet years at Mount Tianshan, which might suggest some  
465 correlation. Drier years at DS (1884, 1947 and 1951) are one or two years later than the  
466 extremely dry years at Mount Tianshan. This suggests that these phenomena could be  
467 related to broader **changes in the extent and strength of the atmospheric circulation.**

468 On a broader (interdecadal) scale, an extreme drought period in 1920s–1930s was  
469 shared by much of northern China (Liang et al., 2006; Fang et al., 2009; Fang et al.,  
470 2010). This is the same drought that we note our chronologies for HL, CL and DS (Liu  
471 et al., 2002; Chen et al., 2010; Fan et al., 2012; Liu et al., 2013; Zhang et al., 2015). A  
472 drought in 1890–1900 was noted by dendrochronological studies and regional history  
473 documents (Yuan, 1994; Ma et al., 2003; Cai and Liu, 2007).

474 Ma and Fu's (2006) study showed a broad shift towards a drying climate in 1977–  
475 78 (eastern area in northwestern China, also northern China). Several other  
476 dendrochronological studies showed a combination of high temperatures and low  
477 precipitation in the late 1970s to early 1990s (Zhang et al., 2005b; Cai and Liu, 2007;  
478 Cai, 2009).



479 This same drought was seen at DS, if somewhat later and for a shorter time. We  
480 also noted its effects at HL and CL. This would be consistent with the increased  
481 humidity of the climate in the eastern region of Northwest China (the EASM-influenced  
482 region experiencing >400 mm precipitation). This region would include Mount  
483 Xinglong (Fang et al., 2009; Chen et al. 2015), the easternmost part of the Qilian  
484 Mountains, and Mount Guiqing (Fang et al., 2010).

485 The wet period that lasted from the 1940s to the early 1970s has been recorded by  
486 several tree-ring-width chronologies covering HL, CL, and DS (Liu et al., 2004; Liu et  
487 al., 2005; Gao et al., 2006; Cai, 2009; Chen et al., 2010). Regional history documents  
488 also record some severe floods disasters in this period (Yuan, 1994). We also see this  
489 wet period in tree-ring-width chronologies from Mount Xinglong (Fang et al., 2009;  
490 Chen et al. 2015) and Mount Guiqing (Fang et al., 2010).

491 The wet period in the 1830s–1840s evident in the chronologies in Xinglong  
492 Mountain (Fang et al., 2009)(Chen et al. 2015) and Guiqing Mountain (Fang et al., 2010)  
493 corresponds to the dry period of DS. The wet period in the 1830s–1840s corresponds  
494 to the dry period of HL and CL, and to the wet period of DS. The observed phenomena  
495 can be attributed to differences in the extent and intensity of EASM and westerly  
496 atmospheric circulations.

497

#### 498 **4.2 Influence of atmospheric circulations and their interaction on climate change** 499 **in the Alxa Plateau**

500 ~~It is known that that~~ water vapor carried by the westerly winds will extend southward  
501 to the northern part of Qinghai, the Hexi region of Gansu, the northern part of Ningxia,  
502 and the northern part of Shaanxi Province, sometimes passing through the northern  
503 border of the Xinjiang region (Li et al., 2012). The area bounded by 35° and 55°N,  
504 110°E and 140°E seems to key to fluctuations in the westerly winds. This in turn affects  
505 the distribution of rain belts in summer. Its mean WCI are weaker positively to the  
506 rainfall in the middle of Yellow River Basin and its northern regions (Yan et al., 2007).  
507 The results showed that the middle ring-width index group of Qinghai spruce in the  
508 three sample sites, which are located in the key area for interaction between wind and



509 monsoon, presented weaker negative correlation with WCI on the interannual scale (Fig.  
510 6).

511 The EASM boundary zone has a greater influence on precipitation at higher  
512 latitudes and thus on vegetation growth. This boundary zone can fluctuate due to the  
513 interannual variability of the EASM and the westerlies. There may be lagging effects  
514 at the mid-latitudes (Ou and Qian, 2006). Again, we note that on an interannual scale,  
515 there is much variation in the strengths and interactions of the EASM and westerly  
516 circulation and thus on climate in our three study regions (Fig. 6).

517 Sun et al. (2019) showed that when the westerly circulation strengthens, high  
518 latitude air pressure drops across the entire Asian continent. Siberian high pressures and  
519 the EASM are weakened. The south of the cold air activity is also correspondingly  
520 weakened. That is not conducive to the north and south of the cold and warm air vapor  
521 exchange to form precipitation. When the lower of the WCI and weakened latitudinal  
522 circulation, the meridional circulation will strengthen, which favors the exchange of  
523 warm and cold air between the north and south to form precipitation.

524 Yang et al. (2019) proposed that in years with weak summer westerlies in the  
525 middle latitudes, the upper-level jet stream tends to shift southward. This southward  
526 displacement of the jet stream, coupled with weakened lower-level divergence, hampers  
527 the northward transport of warm air into the southwestern region. Consequently, this  
528 leads to reduced availability of water vapor sources and ultimately results in diminished  
529 summer precipitation within the transitional zone of typical monsoon activity. If the jet  
530 stream moves northward, precipitation increases.

531 Xu et al. (2010) wrote that in the middle Qilian Mountains the westerly winds affect  
532 precipitation directly, while the EASM only indirectly affects precipitation. When the  
533 westerly winds are stronger, the high precipitation zone moves northwestward; when  
534 they are weaker, the zone moves.

535 At DS, radial growth showed weak negative correlations with higher WCI and also  
536 higher, middle, and lower EASMI groups (Figs. 6;7). At HL, when high chronology  
537 indices are positive they are significantly correlated with westerly circulation; when  
538 they are negative they significantly correlate with EASM (Figs. 6; 7). At CL, which lies





539 further to the south than HL, a higher EASMI leads to a more humid climate. Other  
540 effects are more complicated: for example, the higher and lower ring-width index  
541 groups, associated with extreme dry and wet climate years, have weak negative  
542 correlations to EASMI (Figs. 6; 7). Jiang et al. (2019) published the results of their  
543 hydrogen and oxygen isotope studies of surface water at more than 3,000 sampling sites  
544 in northern China. They showed that surface water recharge in the DS Mountains is due  
545 to the westerly winds; recharge in the CL Mountains is due to the EASM. The HL  
546 Mountains, in contrast, sit at the boundary of the EASM; water recharge there is due to  
547 both the EASM and the westerlies.

548 Jiang and Wang (2005) notes significant declines in the EASM in the mid-1960s  
549 and mid-1970s, which led to decline in the radial growth of Qinghai spruce in our study  
550 area. The effect of the latter declined period was much greater than that of the former,  
551 whatever the intensity or duration. The effects of these declines were stronger at CL  
552 and DS than at HL. In the mid-1970s, EASM retreat had stronger negative effects at  
553 CL and then at HL. However, decline in the EASM proved to be a facilitator of radial  
554 growth at DS (Fig. 8).

555 In the same period the westerly circulation also retreated. The EASM retreated  
556 again in 1990s, while the westerly winds strengthened. This resulted in a drier climate  
557 in the CL Mountains. However, it was also correlated with fluctuating wet periods at  
558 HL and a weak wet period at DS. The above results, to a certain extent, support our  
559 view on the driving mechanisms of climate change in the three study areas, especially  
560 in the DS Mountains.

561 When we look at this area on a geologic scale, we learn that the westerly circulation  
562 strengthened during the Ice Age. Westerly jet streams moved southward to about 35°N.  
563 When the westerly winds weakened in the Interglacial Age, the westerly jet streams  
564 moved northward to ~37°N (Sun et al., 2003). A study of Holocene lake level evolution  
565 in the ancient Zhuye lake, central Alxa Plateau, showed that lake-level change was  
566 subject to the combined effects of EASM and the arid climate of Central Asia (Li, 2009)  
567 This result further illustrates the complexity of lake evolution and climate change in the  
568 EASM marginal zone.



569 The westerly circulation also interacts with the monsoon on the Tibetan Plateau,  
570 which has a profound effect on the climate of the Asian monsoon region as well as the  
571 global climate (Qu et al., 2004). There has also been much research using proxy  
572 indicator cycles indicating that our study area is also influenced by large-scale climate  
573 and ocean-atmosphere changes on interannual and interdecadal scales, such as the  
574 North Atlantic Oscillation (NAO), Pacific Decadal Oscillation (PDO), El Niño-  
575 Southern Oscillation (ENSO), and sunspot activity (Gou et al., 2015a; 2015b; Liu et al.,  
576 2016; Wang et al., 2017).

577 However, all of the above-mentioned large-scale climate and ocean-atmosphere  
578 changes affect the EASM and westerly circulation through different pathways (Li.  
579 2009), which in turn have various effects on the northwestern edge zone of the EASM  
580 and the zone of interaction between the two major atmospheric circulations.

581 In conclusion, based on the analysis of the regional chronologies collected in the  
582 HL, CL and DS mountains that are arrayed around the Alxa Plateau, we can safely assert  
583 that the radial growth of Qinghai spruce in the study area is mainly affected by regional  
584 precipitation. This precipitation varies constantly over time and space, primarily  
585 influenced by the interactions between two atmospheric circulation systems, EASM  
586 and westerly winds. At HL, both of these atmospheric circulation systems play a  
587 significant role in shaping climate changes. At CL, the climate is mainly influenced by  
588 the EASM. At DS, climate is more heavily influenced by the westerly circulation.

589 In the future, it is to be hoped that more refined, smaller scale research can be done  
590 on the climate history in the deserts of the Alxa Plateau. Such research may finally to  
591 provide a theoretical basis to explain regional climate driving mechanisms and thus  
592 enable better desertification controls.

593

594 **Competing interests:** The contact author has declared that none of the authors has any  
595 competing interests.

596

597 **Acknowledgements**



598 The study was jointly funded by the National Natural Science Foundation of China  
599 (NSFC) (No.42171031; 42171167); Inner Mongolia Autonomous Region Special Fund  
600 project for transformation of Scientific and technological Achievements (2021CG0046).

601

## 602 **References**

603 Cai, Q. F.: Response of *Pinus tabulaeformis* tree-ring growth to three moisture indices and  
604 January to July Walter index reconstruction in Helan mountain, Marine geology &  
605 Quaternary geology, 29, 131–136 (In Chinese with English abstract),  
606 <https://doi.org/10.3724/SP.J.1140.2009.06131>, 2009.

607 Cai, Q. F. and Liu, Y.: January to August temperature variability since 1776 inferred from tree-  
608 ring width of *Pinus tabulaeformis* in Helan Mountain, Journal of Geographical Sciences,  
609 17, 293–303, <https://doi.org/10.1007/s11442-007-0293-5>, 2007.

610 Chen, F., Yuan, Y. J., Zhang, T. W., and Linderholm, H. W.: Annual precipitation variation for  
611 the southern edge of the Gobi Desert (China) inferred from tree rings: linkages to climatic  
612 warming of twentieth century, Nat. Hazards, 81, 939–955, <https://doi.org/10.1007/s11069-015-2113-z>, 2016.

614 Chen, F., Wei, W. S., Yuan, Y. J., Yu, S. L., Shang, H. M., Zhang, T. W., Zhang, R. B., Wang, H.  
615 Q., and Qin, L.: Variation of annual precipitation during 1768–2006 in Gansu Inferred from  
616 multi-site tree-ring chronologies, Journal of Desert Research, 33, 1520–1526 (In Chinese  
617 with English abstract), <https://doi.org/10.7522/j.issn.1000-694X.2013.00218.>, 2013.

618 Chen, F., Yuan, Y. J., Wei, W. S., Yu, S. L., Fan, Z. A., Zhang, R. B., Zhang, T. W., Li, Q., and  
619 Shang, H. M.: Temperature reconstruction from tree-ring maximum latewood density of  
620 Qinghai spruce in middle Hexi Corridor, China, Theoretical and Applied Climatology, 107,  
621 633–643, <https://doi.org/10.1007/s00704-011-0512-y>, 2012.

622 Chen, F., Yuan, Y. J., Wei, W. S., Yu, S. L., Li, Y., Zhang, R., Fan, Z., Zhang, T., and Shang, H.:  
623 PDSI changes of May to July recorded by tree rings in the northern Helan Mountains,  
624 Advance in Climate Changes Research, 65, 344–348 (In Chinese with English abstract),  
625 2010.

626 Chen, F. H., Chen, J. H., Huang, W., Chen, S. Q., Huang, X. Z., Jin, L. Y., Jia, J., Zhang, X. J.,  
627 An, C., and Zhang, J.: Westerlies Asia and monsoonal Asia: spatiotemporal differences in  
628 climate change and possible mechanisms on decadal to sub-orbital timescales, Earth-Sci.  
629 Rev., 192, 337–354, <https://doi.org/10.1016/j.earscirev.2019.03.005>, 2019a.

630 Chen, F. H., Fu, B. J., Xia, J., Wu, D., Wu, S. H., Zhang, Y. L., Sun, H., Liu, Y., Fang, X. M.,  
631 Qin, B. Q., Li, X., Zhang, T. J., Liu, B. Y., Dong, Z. B., Hou, S. G., Tian, L. D., Xu, B. Q.,  
632 Dong, G. H., Zheng, J. Y., Yang, W., Wang, X., Li, Z. J., Wang, F., Hu, Z. B., Wang, J.,  
633 Liu, J. B., Chen, J. H., Huang, W., Hou, J. Z., Cai, Q. F., Long, H., Jiang, M., Hu, Y. X.,  
634 Feng, X. M., Mo, X. G., Yang, X. Y., Zhang, D. J., Wang, X. H., Yin, Y. H., and Liu, X.  
635 C.: Major advances in studies of the physical geography and living environment of China



- 636 during the past 70 years and future prospects, *Science China Earth Sciences*, 62, 1665–  
637 1701, <https://doi.org/10.1007/s11430-019-9522-7>, 2019b.
- 638 Chen, J., Huang, W., Jin, L., Chen, J. H., Chen, S. Q., and Chen, F. H.: A climatological northern  
639 boundary index for the East Asian summer monsoon and its interannual variability,  
640 *Science China Earth Sciences*, 61, 13–22, <https://doi.org/10.1007/s11430-017-9122-x>,  
641 2018.
- 642 Ding, Y. H., Liu, Y. J., Xu, Y., Wu, P., Xue, T., Wang, J., Shi, Y., Zhang, Y. X., Song, Y. F., and  
643 Wang, P. L.: Regional responses to global climate change: progress and prospects for trend,  
644 causes, and projection of climatic warming-wetting in Northwest China, *Advances in  
645 Earth Science*, 38, 551–562 (In Chinese with English abstract),  
646 <https://doi.org/10.11867/j.issn.1001-8166.2023.027>, 2023.
- 647 Fan, Z. A., Wei, W. S., Chen, F., and Yuan, Y. J.: Precipitation variation from 1775 to 2005 at  
648 the eastern margin of Tengger Desert, China inferred from tree-ring, *Journal of Desert  
649 Research*, 32, 996–1002 (In Chinese with English abstract), 2012.
- 650 Fang, K. Y., Gou, X. H., Chen, F. H., D'arrigo, R., and Li, J. B.: Tree-ring based drought  
651 reconstruction for the Guiqing Mountain (China): linkages to the Indian and Pacific  
652 Oceans, *Int. J. Climatol.*, 30, 1137–1145, <https://doi.org/10.1002/joc.1974>, 2010.
- 653 Fang, K. Y., Gou, X. H., Chen, F. H., Yang, M. X., Li, J. B., He, M. S., Zhang, Y., Tian, Q. H.,  
654 and Peng, J. F.: Drought variations in the eastern part of northwest China over the past two  
655 centuries: evidence from tree rings, *Clim. Res.*, 38, 129–135,  
656 <https://doi.org/10.3354/cr00781>, 2009.
- 657 Feng, W., Wang, K. L., and Jiang, H.: Influences of westerly wind inter-annual change on water  
658 vapor transport over northwest china summer, *Plateau Meteorology*, 23, 270–275 (In  
659 Chinese with English abstract), 2004.
- 660 Gao, S. Y., Lu, R. J., Qiang, M. R., Ha, S., Zhang, D. S., Chen, Y., and Xia, H.: Precipitation  
661 variation recorded by tree-rings in the northern Tengger Desert of the last 140 years, *Chin.  
662 Sci. Bull.*, 51, 326–331, <https://doi.org/10.1360/csb2006-51-3-326>, 2006.
- 663 Gou, X. H., Gao, L. L., Deng, Y., Chen, F. H., Yang, M. X., and Still, C.: An 850 - year tree -  
664 ring - based reconstruction of drought history in the western Qilian Mountains of  
665 northwestern China, *Int. J. Climatol.*, 35, 3308–3319, <https://doi.org/10.1002/joc.4208>,  
666 2015a.
- 667 Gou, X. H., Deng, Y., Gao, L. L., Chen, F. H., Cook, E., Yang, M. M., and Zhang, F.: Millennium  
668 tree-ring reconstruction of drought variability in the eastern Qilian Mountains, northwest  
669 China, *Climate Dynamics*, 45, 1761–1770, <https://doi.org/10.1007/s00382-014-2431-y>,  
670 2015b.
- 671 Huang, L. X., Chen, J., Yang, K., Yang, Y. J., Huang, W., Zhang, X., and Chen, F. H.: The  
672 northern boundary of the Asian summer monsoon and division of westerlies and monsoon  
673 regimes over the Tibetan Plateau in present-day, *Science China Earth Sciences*, 66, 882–  
674 893, <https://doi.org/10.1007/s11430-022-1086-1>, 2023.



- 675 Jiang, D. B. and Wang, H. J.: Natural interdecadal weakening of East Asian summer monsoon  
676 in the late 20th century, *Chin. Sci. Bull.*, 50, 1923–1929, [https://doi.org/10.1360/982005-](https://doi.org/10.1360/982005-36)  
677 36, 2005.
- 678 Jiang, P., Liu, H. Y., Wu, X. C., and Wang, H. Y.: Tree-ring-based SPEI reconstruction in central  
679 Tianshan Mountains of China since A.D. 1820 and links to westerly circulation, *Int. J.*  
680 *Climatol.*, 37, 2863–2872, <https://doi.org/10.1002/joc.4884>, 2017.
- 681 Jiang, W. J., Wang, G. C., Sheng, Y. Z., Shi, Z. M., and Zhang, H.: Isotopes in groundwater ( $^2\text{H}$ ,  
682  $^{18}\text{O}$ ,  $^{14}\text{C}$ ) revealed the climate and groundwater recharge in the Northern China, *Sci. Total*  
683 *Environ.*, 666, 298–307, <https://doi.org/10.1016/j.scitotenv.2019.02.245>, 2019.
- 684 Kang, S. Y. and Yang, B.: Precipitation variability at the northern fringe of the Asian summer  
685 monsoon in Northern China and its possible mechanism over the past 530 years,  
686 *Quaternary Sciences*, 35, 1185–1193, [https://doi.org/10.11928/j.issn.1001-](https://doi.org/10.11928/j.issn.1001-7410.2015.05.14)  
687 7410.2015.05.14, 2015.
- 688 Kang, S. Y., Yang, B., and Qin, C.: Recent tree-growth reduction in north central China as a  
689 combined result of a weakened monsoon and atmospheric oscillations, *Clim. Change*, 115,  
690 519–536, <https://doi.org/10.1007/s10584-012-0440-6>, 2012.
- 691 Li, D. L., Shao, P. C., and Wang, H.: The position variations of the north boundary of East Asia  
692 subtropical summer monsoon in 1951–2009, *Journal of Desert Research*, 33, 1511–1519  
693 (In Chinese with English abstract), <https://doi.org/10.7522/j.issn.1000-694X.2013.00217>,  
694 2013.
- 695 Li, J. L., Li, Z. R., Yang, J. C., Shi, Y. Z., and Fu, J.: Analyses on spatial distribution and  
696 temporal variation of atmosphere water vapor over northwest China in summer of later 10  
697 years, *Plateau Meteorology*, 31, 1574–1581 (In Chinese with English abstract), 2012.
- 698 Li, J. P. and Zeng, Q. C.: A new monsoon index, its interannual variability and related with  
699 monsoon precipitation, *Climatic and Environmental Research*, 10, 351–365 (In Chinese  
700 with English abstract), 2005.
- 701 Li, W. L., Wang, K. L., Fu, S. M., and Jiang, H.: The interrelationship between regional Westerly  
702 index and the water vapor budget in Northwest China, *Journal of Glaciology and*  
703 *Geocryology*, 30, 28–34 (In Chinese with English abstract), 2008.
- 704 Li, Y.: The pollen records from lake sediments and climate & lake model in the Marginal area  
705 of Asian monsoon, Lanzhou University, Lanzhou, China, 2009.
- 706 Li, Z. X., Feng, Q., Song, Y., Wang, Q. J., Yang, J., Li, Y. G., Li, J. G., and Guo, X. Y.: Stable  
707 isotope composition of precipitation in the south and north slopes of Wushaoling Mountain,  
708 northwestern China, *Atmospheric Research*, 182, 87–101,  
709 <https://doi.org/10.1016/j.atmosres.2016.07.023>, 2016.
- 710 Liang, E. Y., Liu, X. H., Yuan, Y. J., Qin, N. S., Fang, X. Q., Huang, L., Zhu, H. F., Wang, L.,  
711 and Shao, X. M.: The 1920s drought recorded by tree rings and historical documents in  
712 the semi-arid and arid areas of Northern China, *Clim. Change*, 79, 403–432,  
713 <https://doi.org/10.1007/s10584-006-9082-x>, 2006.



- 714 Liu, J. B., Chen, J., Chen, S. Q., Yan, X. W., Dong, H. R., and Chen, F. H.: Dust storms in  
715 northern China and their significance for the concept of the Anthropocene, *Science China*  
716 *Earth Sciences*, 65, 921–933, <https://doi.org/10.1007/s11430-021-9889-8>, 2022.
- 717 Liu, Y., Cai, Q. F., Ma, L. M., and An, Z. S.: Tree ring precipitation records from Baotou and  
718 the East Asia summer monsoon variations for the last 254 years, *Earth Sci. Front.*, 8, 91–  
719 97 (In Chinese with English abstract), <https://doi.org/10.3321/j.issn:1005-2321.2001.01.012>, 2001.
- 721 Liu, Y., Sun, C. F., Li, Q., and Cai, Q. F.: A *Picea crassifolia* tree-ring width-based temperature  
722 reconstruction for the Mt. Dongda region, Northwest China, and its relationship to large-  
723 scale climate forcing, *PLoS One*, 11, e0160963,  
724 <https://doi.org/10.1371/journal.pone.0160963>, 2016.
- 725 Liu, Y., Lei, Y., Sun, B., Song, H. M., and Li, Q.: Annual precipitation variability inferred from  
726 tree-ring width chronologies in the Changling–Shoulu region, China, during AD 1853–  
727 2007, *Dendrochronologia*, 31, 290–296, <https://doi.org/10.1016/j.dendro.2013.02.001>,  
728 2013.
- 729 Liu, Y., Won-Kyu, P., Cai, Q. F., Jung-Wook, S., and Hyun-Sook, J.: Monsoonal precipitation  
730 variation in the East Asia since A.D. 1840—tree-ring evidences from China and Korea,  
731 *Science in China Series D: Earth Sciences*, 46, 1031–1039,  
732 <https://doi.org/10.1007/BF02959398>, 2003.
- 733 Liu, Y., Ma, L. M., Cai, Q. F., An, Z. S., Liu, W. G., and Gao, L. Y.: Reconstruction of summer  
734 temperature (June–August) at Mt. Helan, China, from tree-ring stable carbon isotope  
735 values since AD 1890, *Science in China Series D: Earth Sciences*, 45, 1127–1136,  
736 <https://doi.org/10.1360/02yd9109>, 2002.
- 737 Liu, Y., Cai, Q. F., Liu, W. G., Yang, Y. K., Sun, J. Y., Song, H. M., and Li, X. X.: Monsoon  
738 precipitation variation recorded by tree-ring  $\delta^{18}\text{O}$  in arid Northwest China since AD 1878,  
739 *Chemical Geology*, 252, 56–61, <https://doi.org/10.1016/j.chemgeo.2008.01.024>, 2008.
- 740 Liu, Y., Cai, Q. F., Shi, J. F., Hughes, M. K., Kutzbach, J. E., Liu, Z. Y., Ni, F. B., and An, Z. S.:  
741 Seasonal precipitation in the south-central Helan Mountain region, China, reconstructed  
742 from tree-ring width for the past 224 years, *Canadian Journal of Forest Research*, 35,  
743 2403–2412, <https://doi.org/10.1139/x05-168>, 2005.
- 744 Liu, Y., Shi, J. F., Shishov, V., Vaganov, E., Yang, Y. K., Cai, Q. F., Sun, J. Y., Wang, L., and  
745 Djanseitov, I.: Reconstruction of May–July precipitation in the north Helan Mountain,  
746 Inner Mongolia since A.D. 1726 from tree-ring late-wood widths, *Chin. Sci. Bull.*, 49,  
747 405–409, <https://doi.org/10.1007/BF02900325>, 2004.
- 748 Ma, L. M., Liu, Y., Cai, Q. F., and An, Z. S.: The precipitation records from tree-ring late wood  
749 width in the helan mountain, *Marine geology & Quaternary geology*, 23, 109–114 (In  
750 Chinese with English abstract), <https://doi.org/10.16562/j.cnki.0256-1492.2003.04.016>,  
751 2003.
- 752 Ma, M. J., Pu, Z. X., Wang, S. G., and Zhang, Q. A.: Characteristics and numerical simulations



- 753 of extremely large atmospheric boundary-layer heights over an arid region in north-west  
754 china, *Boundary-Layer Meteorology*, 140, 163–176, [https://doi.org/10.1007/s10546-011-](https://doi.org/10.1007/s10546-011-9608-2)  
755 9608-2, 2011.
- 756 Ma, Z. G. and Fu, C. B.: The basic facts of aridity in northern China from 1951 to 2004, *Chin.*  
757 *Sci. Bull.*, 51, 2429–2439 (In Chinese), <https://doi.org/10.1360/csb2006-51-20-2429>,  
758 2006.
- 759 Ou, T. H. and Qian, W. H.: Vegetation variations along the monsoon boundary zone in East  
760 Asia, *Chinese Journal of Geophysics*, 49, 698–705 (In Chinese with English abstract),  
761 2006.
- 762 Qin, L., Liu, G. X., Li, X. Z., Chongyi, E., Li, J., Wu, C. R., Guan, X., and Wang, Y.: A 1000-  
763 year hydroclimate record from the Asian summer monsoon-Westerlies transition zone in  
764 the northeastern Qinghai-Tibetan Plateau, *Clim. Change*, 176, 1–20,  
765 <https://doi.org/10.1007/s10584-023-03497-1>, 2023.
- 766 Qu, W. J., Zhang, X. H., Wang, D., Shen, Z. X., Mei, F. M., Cheng, Y., and Yan, L. W.: The  
767 important significance of westerly wind study, *Marine Geology and Quaternary Geology*,  
768 24, 125–132 (In Chinese with English abstract), [https://doi.org/10.16562/j.cnki.0256-](https://doi.org/10.16562/j.cnki.0256-1492.2004.01.018)  
769 1492.2004.01.018, 2004.
- 770 Shao, X. M., Xu, Y., Yin, Z. Y., Liang, E. Y., Zhu, H. F., and Wang, S.: Climatic implications of  
771 a 3585-year tree-ring width chronology from the northeastern Qinghai-Tibetan Plateau,  
772 *Quaternary Science Reviews*, 29, 2111–2122,  
773 <https://doi.org/10.1016/j.quascirev.2010.05.005>, 2010.
- 774 Sun, D. H., An, Z. S., Su, R. H., Deer, H. Y., and Sun, Y. B.: The dust deposition records of the  
775 evaluation of Asia monsoon and Westerly circulation in north China in the last 2.6Ma,  
776 *Science in China (Series D)*, 33, 497–504 (In Chinese), 2003.
- 777 Sun, L. Q., Li, T. J., Li, Q. L., and Wu, Y. P.: Responses of autumn flood peak in the Yellow  
778 River source regions to westerly circulation index, *Journal of Glaciology and Geocryology*,  
779 41, 1475–1482 (In Chinese with English abstract), [https://doi.org/10.7522/j.issn.1000-](https://doi.org/10.7522/j.issn.1000-0240.2019.0028)  
780 0240.2019.0028, 2019.
- 781 Tang, X., Qian, W. H., and Liang, P.: Climatic features of boundary belt for East Asian Summer  
782 Monsoon, *Plateau Meteorology*, 25, 375–381 (In Chinese with English abstract), 2006.
- 783 Wang, B. J., Huang, Y. X., He, J. H., and Wang, L. J.: Relation between vapour transportation  
784 in the period of East Asian Summer Monsoon and drought in Northwest China., *Plateau*  
785 *Meteorology*, 23, 912–917 (In Chinese with English abstract), 2004.
- 786 Wang, J. L., Yang, B., Ljungqvist, F. C., Luterbacher, J., Osborn, Timothy j., Briffa, K. R., and  
787 Zorita, E.: Internal and external forcing of multidecadal Atlantic climate variability over  
788 the past 1,200 years, *Nature Geoscience*, 10, 512–517, <https://doi.org/10.1038/ngeo2962>,  
789 2017.
- 790 Wang, K. L., Jiang, H., and Zhao, H. Y.: Atmospheric water vapor transport from westerly and  
791 monsoon over the Northwest China, *Advances in Water Science*, 16, 432–438 (In Chinese



- 792 with English abstract), <https://doi.org/10.14042/j.cnki.32.1309.2005.03.021>, 2005.
- 793 Xiao, S. C., Chen, X. H., and Ding, A. J.: Study process of climate changes, environment  
794 evolution and its driving mechanism in the last two centuries in the Alxa Desert, *Journal*  
795 *of Desert Research*, 37, 1102–1201 (In Chinese with English abstract),  
796 [10.7522/j.issn.1000-694x.2017.00002](https://doi.org/10.7522/j.issn.1000-694x.2017.00002), 2017.
- 797 Xiao, S. C., Yan, C. Z., Tian, Y. Z., Si, J. H., Ding, A. J., Chen, X. H., Han, C., and Teng, Z. Y.:  
798 Regionalization for desertification control and countermeasures in the Alxa Plateau, China,  
799 *Journal of Desert Research*, 39, 182–192 (In Chinese with English abstract),  
800 <https://doi.org/10.7522/j.issn.1000-694X.2019.00068>, 2019.
- 801 Xu, J. J., Wang, K. L., Jiang, H., Li, Z. G., Sun, J., Luo, X. P., and Zhu, Q. L.: A numerical  
802 simulation of the effects of Westerly and Monsoon on precipitation in the Heihe River  
803 Basin, *Journal of Glaciology and Geocryology*, 32, 489–496 (In Chinese with English  
804 abstract), 2010.
- 805 Yan, H. S., Hu, J., Fan, K., and Zhang, Y. J.: The analysis of relationship between the variations  
806 of Westerly Index in summer and precipitation during the flood period over China in the  
807 last 50 years. , *Chinese Journal of Atmospheric Science*, 31, 717–726 (In Chinese with  
808 English abstract), 2007.
- 809 Yang, B., Qin, C., Wang, J. L., He, M. H., Melvin, T. M., Osborn, T. J., and Briffa, K. R.: A  
810 3,500-year tree-ring record of annual precipitation on the northeastern Tibetan Plateau,  
811 *Proc. Natl. Acad. Sci. USA*, 111, 2903–2908, <https://doi.org/10.1073/pnas.1319238111>,  
812 2014.
- 813 Yang, J. H., Zhang, Q., Liu, X. Y., Yue, P., Shang, J. L., Ling, H., and Li, W. J.: Spatial-temporal  
814 characteristics and causes of summer precipitation anomalies in the transitional zone of  
815 typical summer monsoon, China, *Chinese Journal of Geophysics*, 62, 4120–4128 (In  
816 Chinese with English abstract), <https://doi.org/10.6038/cjg2019M0639>, 2019.
- 817 Yuan, L.: *Hazards history in northwestern China*, Gansu people's press, Lanzhou, China 1994.
- 818 Zhang, F., Chen, Q. M., Su, J. J., Deng, Y., Gao, L. L., and Gou, X. H.: Tree-ring recorded of  
819 the drought variability in the northwest monsoon marginal, China, *Journal of Glaciology*  
820 *and Geocryology*, 39, 245–251 (In Chinese with English abstract),  
821 <https://doi.org/10.7522/j.issn.1000-0240.2017.0028>, 2017.
- 822 Zhang, Q., Yang, J. H., Wang, P. L., Yu, H. P., Yue, P., Liu, X. Y., Lin, J. J., Duan, X. Y., Zhu,  
823 B., and Yan, X. Y.: Progress and prospect on climate warming and humidification in  
824 Northwest China, *Chin. Sci. Bull.*, 68, 1814–1828, <https://doi.org/10.1360/TB-2022-0643>,  
825 2023.
- 826 Zhang, Q. B., Cheng, G. D., Yao, T. D., Kang, X. C., and Huang, J. G.: A 2,326 year tree-ring  
827 record of climate variability on the northeastern Qinghai-Tibetan Plateau, *Geophys. Res.*  
828 *Lett.*, 30, 1739, <https://doi.org/10.1029/2003GL017425>, 2003.
- 829 Zhang, Q. L., Liu, W. G., Liu, Y., Ning, Y. F., and Wen, Q. B.: Relationship between the stable  
830 carbon and oxygen isotopic compositions of tree ring in the Mt. Helan region,





- 831           Northwestern China, *Geochimica*, 34, 51–56, [https://doi.org/10.19700/j.0379-](https://doi.org/10.19700/j.0379-1726.2005.01.006)  
832           1726.2005.01.006, 2005a.
- 833   Zhang, S., Xu, H., Lan, J. H., Goldsmith, Y., Torfstein, A., Zhang, G. L., Zhang, J., Song, Y. P.,  
834           Zhou, K. E., Tan, L. C., Xu, S., Xu, X. M., and Enzel, Y.: Dust storms in northern China  
835           during the last 500 years, *Science China Earth Sciences*, 64, 813–824,  
836           <https://doi.org/10.1007/s11430-020-9730-2>, 2021.
- 837   Zhang, Y., Shao, X. M., Yin, Z. Y., Liang, E. Y., Tian, Q. H., and Xu, Y.: Characteristics of  
838           extreme droughts inferred from tree-ring data in the Qilian Mountains, 1700–2005, *Clim.*  
839           *Res.*, 50, 141–159, <https://doi.org/10.3354/cr01051>, 2011.
- 840   Zhang, Y. X., Yu, L., and Yin, H.: Annual precipitation reconstruction over last 191 years at the  
841           south edge of Badain Jaran Desert based on tree ring width data, *Desert and Oasis*  
842           *Meteorology*, 9, 12–16 (In Chinese with English abstract),  
843           <https://doi.org/10.3969/j.issn.1002-0799.2015.01.003>, 2015.
- 844   Zhang, Y. X., Gou, X. H., Hu, W. D., Peng, J. F., and Liu, P. X.: The drought events recorded  
845           in tree ring width in Helan Mt. over past 100 years, *Acta Ecologica Sinica*, 25, 2121–2126  
846           (In Chinese with English abstract), 2005b.  
847
